## 1 **Humidity as a non-pharmaceutical intervention for influenza A**

2 Jennifer M. Reiman<sup>1¶</sup>, Biswadeep Das<sup>1,2¶</sup>, Gregory M. Sindberg<sup>1</sup>, Mark D. Urban<sup>3</sup>, Madeleine  
3 E.M. Hammerlund<sup>1</sup>, Han B. Lee<sup>4</sup>, Katie M. Spring<sup>5</sup>, Jamie Lyman-Gingerich<sup>6</sup>, Alex R.  
4 Generous<sup>7</sup>, Tyler H. Koep<sup>8</sup>, Kevin Ewing<sup>9</sup>, Phil Lilja<sup>10</sup>, Felicity T. Enders<sup>11</sup>, Stephen C.  
5 Ekker<sup>1,3</sup>, W. Charles Huskins<sup>1,12</sup>, Hind J. Fadel<sup>13</sup>, Chris Pierret<sup>1,3,12\*</sup>

6 1. Center for Clinical and Translational Science, Mayo Clinic, Rochester, Minnesota,  
7 United States of America

8 2. School of Biotechnology, KIIT University, Bhubaneswar, India

9 3. Department of Biochemistry and Molecular Biology, Mayo Clinic, Rochester, Minnesota,  
10 United States of America

11 4. Neurobiology of Disease Graduate Program, Mayo Clinic, Rochester, Minnesota, United  
12 States of America

13 5. Department of Molecular Medicine, Mayo Clinic, Rochester, Minnesota, United States of  
14 America

15 6. Department of Biology, University of Wisconsin- Eau Claire, Eau Claire, Wisconsin,  
16 United States of America

17 7. Virology and Gene Therapy Graduate Program, Mayo Clinic, Rochester, Minnesota,  
18 United States of America

19 8. Department of Biology Teaching and Learning, University of Minnesota, St. Paul,  
20 Minnesota, United States of America

21 9. Aldrich Memorial Nursery School, Rochester, Minnesota, United States of America

22 10. DriSteen, Eden Prairie, Minnesota, United States of America

23 11. Department of Health Sciences Research, Mayo Clinic, Rochester, Minnesota, United  
24 States of America

25 12. Department of Pediatric and Adolescent Medicine, Mayo Clinic, Rochester, Minnesota,  
26 United States of America

27 13. Department of Infectious Disease, Mayo Clinic, Rochester, Minnesota, United States of  
28 America

29 \* Corresponding author, email: [Pierret.Christopher@mayo.edu](mailto:Pierret.Christopher@mayo.edu) (CP)

30

31 ¶ These authors contributed equally to this work.

## 32 **Abstract**

33 Influenza is a global problem infecting 5-10 % of adults and 20-30 % of children annually. Non-  
34 pharmaceutical interventions (NPIs) are attractive approaches to complement vaccination in the  
35 prevention and reduction of influenza. Strong cyclical reduction of absolute humidity has been  
36 associated with influenza outbreaks in temperate climates. This study tested the hypothesis that  
37 raising absolute humidity above seasonal lows would impact influenza virus survival and  
38 transmission in a key source of influenza distribution, a community school. Air samples and  
39 objects handled by students (e.g. blocks and markers) were collected from preschool classrooms.  
40 All samples were processed and PCR used to determine the presence of influenza and its amount.  
41 Additionally samples were tested for their ability to infect cells in cultures. Deliberate classroom  
42 humidification (with commercial steam humidifiers) resulted in a significant reduction of the  
43 total number of influenza positive samples (air and fomite), viral copy number, and efficiency of  
44 viral infectivity. This is the first prospective study suggesting that exogenous humidification  
45 could serve as a scalable NPI for influenza or other viral outbreaks.

## 46 **Author summary**

47 Human influenza infections have a substantial impact on society (including lost productivity and  
48 medical costs). Children, 3-4 years of age are the main introducers and spreaders of influenza  
49 within a household and community. There is evidence from laboratory and epidemiological  
50 studies that suggests that low humidity in winter (in temperate climates) may increase the ability  
51 of influenza virus to survive and spread between individuals. We wanted to know if added in  
52 humidity (through steam humidifiers) could reduce the amount of influenza present and its  
53 spread within preschool classrooms (students aged 3-4 years)? Additionally, we looked at the  
54 infectivity of the influenza isolated and if there were differences in the number of students with

55 influenza-like illnesses during our study. We show that humidification can reduce the amount of  
56 influenza present within samples from preschool classrooms and that there were fewer infectious  
57 samples compared to non-humidified rooms. There were small numbers of students ill with  
58 influenza like illnesses during our study so additional studies will need to look further at  
59 humidification as a way to reduce influenza infection and transmission.

60

61 **Key Words: influenza, humidification, non-pharmaceutical intervention, preschool,**  
62 **aerosols, fomites**

63

## 64 **Introduction**

65 Non-pharmaceutical interventions (NPIs) can complement traditional vaccination and anti-viral  
66 medications for infectious disease. NPIs are particularly significant for diseases like influenza,  
67 which have not shown to be well managed by vaccination alone. Worldwide, annual influenza  
68 epidemics are estimated to infect 5-10 % of adults and 20-30 % of children resulting in 3 to 5  
69 million cases of severe illness and 250,000 to 500,000 deaths[1]. These infections account for  
70 10% of global respiratory hospitalizations in children under 18 years of age[2]. Direct medical  
71 costs (2015) for influenza for inpatient care have been estimated at \$3,650- \$9,660 per case  
72 (reviewed in[3]) and a total economic burden of influenza exceeding \$87 billion per year in the  
73 USA[4]. In Minnesota, USA, the 2014-15 influenza season was especially severe with 4,202  
74 people hospitalized with laboratory-confirmed influenza infection and 10 confirmed pediatric  
75 influenza-related deaths. This was the highest rate reported for the past six seasons including the  
76 H1N1 influenza pandemic in 2009[5]. Influenza and respiratory syncytial virus (RSV) accounted  
77 for over 50 % of hospitalizations (all ages) from respiratory infections with an additional 706

78 outbreaks of influenza-like illness (ILI) reported in schools[5]. This increase in influenza was  
79 attributed to antigenic drift, leaving the vaccine largely ineffective. The 2014-15 influenza  
80 season illustrates why alternative approaches such as NPIs could prove to be valuable in disease  
81 prevention.

82

83 The probability for influenza transmission increases in situations where many people are in  
84 enclosed spaces and in close proximity such as airplanes and naval ships[6]. Children play a  
85 critical role in the transmission of acute respiratory infections within a community[7]. Survival  
86 and transmission of influenza may be impacted by the droplet size of airborne influenza. Larger  
87 droplets settle out of air at a more rapid rate, and do not penetrate as deep into the respiratory  
88 tract to seed infection[8]. Under laboratory conditions, others have shown that infectious  
89 influenza virus can persist from hours to days (17 days on banknotes with respiratory  
90 secretions[9]) in objects as varied as surface dust[10], cloth, pillow case, soft fabric toy, light  
91 switch material, formica, vinyl, and stainless steel[11, 12]. Researchers have demonstrated  
92 transfer of infectious influenza A from stainless steel surfaces (up to 24 hours) or from paper  
93 tissues (15 minutes) to hands, while remaining infectious on hands for 5[13] - 60[12] minutes.

94

95 The mortality and transmission rates of influenza A have been associated with decreased  
96 absolute humidity (AH) [14]. This epidemiological correlation suggests that deliberate increases  
97 in AH could be a potential NPI to reduce the spread of influenza and other viruses. One  
98 approach is to maintain relative humidity (RH) between 40-60 %, the proposed optimal range for  
99 reducing growth opportunities for viruses, bacteria, and fungi[15]. Our previous study,  
100 demonstrated that classroom humidification to RH of 40-60 % may be a feasible approach to

101 increase indoor AH to levels with the potential to reduce influenza virus survival (a target of  
102 10mb) and transmission as predicted by modeling analyses[16].

103  
104 Community schools are promising locations for potential use of humidity as a NPI due to the role  
105 of children as a key source of influenza transmission from the community into a household[4].

106 We developed a novel in-school sampling process (S1 Fig) sensitive enough to detect influenza  
107 presence, quantity (viral RNA), and infectivity.

108  
109 Outside of the laboratory, no prior studies have tested the potential for humidification to serve as  
110 an NPI. A few groups have succeeded in collecting influenza (RNA) from air samples in health  
111 care settings[17, 18]. One group also detected influenza (RNA) within air samples at a day-care  
112 facility (babies' and toddlers' rooms) and on board airplanes across the USA[18]. However,  
113 these studies did not detect and isolate infectious influenza from fomites in field conditions.

114 This study investigated the presence and infectivity of influenza A in active preschool  
115 classrooms under control and humidified conditions.

116

## 117 **Results**

118 At the end of the 2015-2016 influenza season, an analysis of MN hospitalizations attributed to  
119 influenza (data supplied by MN Department of Health via FluSurv-NET)[19] revealed three  
120 troughs in atmospheric absolute humidity with the largest one (February 14, 2016)[20] preceding  
121 the peak of the seasonal influenza outbreak (Fig. 1A). The peak for confirmed hospitalized  
122 influenza cases (confirmed positive) was the week ending March 12, 2016.

123

124 Elevated classroom humidification was maintained at an average of 9.89 mb in humidified rooms  
125 compared to 6.33 mb in control rooms (January 25 through February 23). AH was targeted near  
126 10 mb based on previously demonstrated achievable levels in classrooms and a calculated 1-hour  
127 virus survival of 35 % (down from 75 % when AH ~3-4 mb). Samples positive for influenza A  
128 virus are depicted in Table 1.

129 **Table 1. Influenza A positive samples by RT-PCR from preschool.**

| Sample Type           | Control # (%) positive | Control # samples | Humidified # (%) positive | Humidified # samples | OR, [95 % CI], P>  z     |
|-----------------------|------------------------|-------------------|---------------------------|----------------------|--------------------------|
| Fomites               | 31 (22.1)              | 140               | 27 (18.0)                 | 150                  | 0.51, [0.33-0.78], 0.002 |
| Air (total)           | 33 (18.3)              | 180               | 21 (11.7)                 | 180                  | 0.51, [0.29-0.89], 0.020 |
| Air <1 $\mu\text{m}$  | 8 (13.3)               | 60                | 6 (10.0)                  | 60                   | 1.25, [0.91-1.72], 0.174 |
| Air 1-4 $\mu\text{m}$ | 15 (25.0)              | 60                | 10 (16.7)                 | 60                   | 0.48, [0.16-1.42], 0.183 |
| Air >4 $\mu\text{m}$  | 10 (16.7)              | 60                | 5 (8.3)                   | 60                   | 0.51, [0.23-1.10], 0.087 |

130 The number of positive samples in each sample type is indicated, the total number of samples  
131 collected and the % positive (in parentheses) for control and humidified rooms. Statistical  
132 analyses of OR, 95 % CI and P>|z| are indicated.

133  
134 A total of 650 samples were collected (320 in control rooms, 330 in humidified rooms) of which  
135 112 (17 %) were positive for influenza A virus by RT-PCR (S2A-2B Figs). There were fewer  
136 influenza A positive samples in humidified rooms compared to control rooms for both fomites  
137 and for total air. However, when individual sizes of air particles were examined, differences did  
138 not achieve statistical significance. The distribution of influenza A positive samples within the  
139 different sizes of air particles varied with the greatest percentage of positive samples within the  
140 1-4  $\mu\text{m}$  size for both control and humidified rooms (Table 1).

141

142 Quantitative RT-PCR of influenza A virus for copy number revealed a significant reduction in  
143 mean copy number in humidified rooms compared to controls for fomites ( $P < 0.001$ ) and air  
144 (total) ( $P < 0.001$ ). Review of qRT-PCR data at individual particle sizes revealed that air  $< 1 \mu\text{m}$   
145 ( $P = 0.010$ ), and air  $> 4 \mu\text{m}$  ( $P = 0.011$ ) experienced a significant reduction (Fig. 2A and Table S1).  
146 Mean copy number for air between 1-4  $\mu\text{m}$  ( $P = 0.208$ ) trended lower in humidified rooms but  
147 was not statistically different from control rooms at a 95 % CI. Viral copy number varied among  
148 different sample types with fomites having the highest copy number followed by air 1-4  $\mu\text{m}$   
149 particles (Table S1).

150  
151 Electrical impedance assay [21] revealed 30 % of RT-PCR positive classroom samples to be  
152 infectious (Fig. 2B and Fig. S3). There were a smaller percentage of infectious samples from the  
153 humidified rooms (19 %) than the control rooms (81 %). The corresponding average viral copy  
154 number in the infectious samples in the humidified rooms was 30 and 40 in control rooms.

155  
156 The majority of air particles were less than 1  $\mu\text{m}$  size for both humidified and control rooms.  
157 Average particle numbers decreased with increasing size in both sets of rooms ( $< 1 \mu\text{m}$ : 45500  
158 control vs 70400 humidified), (1-4  $\mu\text{m}$ : 2820 control vs 4060 humidified), ( $> 4 \mu\text{m}$ : 139 control  
159 vs 227 humidified). Particles generated from the humidifier and the average counts from 7  
160 independent measurements over a 22-minute period showed more than 96% of the particles  
161 provided by humidification were less than 1  $\mu\text{m}$ . Yet, humidified rooms showed a near doubling  
162 of both 1-4  $\mu\text{m}$ , and  $> 4 \mu\text{m}$  air particles. This indicates a likely combination of the small particles  
163 added by humidification with present (and potentially influenza-bearing) particles. Larger  
164 particles remain airborne for less time (4  $\mu\text{m}$  takes 33 minutes to settle 1 meter in still air versus

165 1  $\mu\text{m}$  takes 8 hours)[17] and are unable to reach as deep within airways so are thought to be less  
 166 pathogenic[8].

167  
 168 From January 25- March 11, 2016, 10 influenza-like illnesses (ILI) from absent students were  
 169 recorded by school personnel. Seven of these absences were from control (non-humidified)  
 170 rooms and three were from humidified rooms. As shown in Table 2, in a per-room comparison of  
 171 humidified and control rooms the % positive (# PCR+ /total samples per room), % infective (#  
 172 positive by infectivity/ # PCR positive tested per room), and % of students with ILI absences (#  
 173 students with fever + cough or fever + sore throat / 32 days of classes) all were lower in  
 174 humidified rooms than control rooms.

175 **Table 2. Influenza A positive and infectious samples and ILI absences by room.**

|                                                                              | Control         |                 | Humidified      |                 |
|------------------------------------------------------------------------------|-----------------|-----------------|-----------------|-----------------|
| Influenza A                                                                  | Room A          | Room B          | Room C          | Room D          |
| % positive<br>(# PCR+ / total<br>samples per room)                           | 33/160=<br>21 % | 31/160=<br>19 % | 27/165=<br>16 % | 21/165=<br>13 % |
| % infective<br>(# positive by<br>infectivity/ # positive<br>tested per room) | 6/15=<br>40 %   | 7/12=<br>58 %   | 2/7=<br>29 %    | 1/11=<br>9 %    |
| % students ILI*<br>(# students ILI/<br>32 days of classes)                   | 3/32=<br>9 %    | 4/32=<br>13 %   | 2/32=<br>6 %    | 1/32=<br>3 %    |

176 Percentage of student absenteeism showed a logical flow from initial positive sampling. %  
 177 positive is number PCR+ divided by total samples per room. % infective is number positive by  
 178 electrical impedance assay divided by number PCR positive samples tested in electrical  
 179 impedance assay. ILI indicates influenza-like illness absence based on symptoms reported. % of  
 180 students with ILI absences is number of students out ill with fever plus cough at any point during



181 the 32 days of classes (January 25- March 11, 2016) divided by the 32 classes. \*Only absences  
182 within the timeframe of sample collection (January 25- March 11, 2016) are included.

183

## 184 **Discussion**

185 This study monitored transmission of influenza A in preschool classrooms during the dry winter  
186 months (low indoor humidity), which correspond with peak respiratory virus infections in  
187 Minnesota. An increase in average AH from 6.33 mb in control rooms to 9.89 mb in humidified  
188 rooms (RH ~42-45 %) was associated with a significant decrease in influenza A virus presence  
189 in fomite and air samples in humidified rooms compared to control rooms. Additionally, PCR-  
190 positive samples from humidified rooms exhibited lower infectivity than samples from control  
191 rooms. The decrease in infectivity could be driven by a lower viral load of the PCR-positive  
192 humidified room samples as compared to PCR-positive control room samples. This correlates  
193 with the lower copy number of influenza A PCR positive samples observed in humidified rooms.  
194 Enveloped viruses such as influenza are less stable in the environment than non-enveloped  
195 viruses and are more sensitive to higher relative humidity[22-24]. The exact mechanism  
196 underlying the action of humidity on the survival of the influenza virus is still not fully  
197 understood[25]. Several studies have hypothesized that surface inactivation for viruses with  
198 structural lipids may be due to denaturing of the lipoproteins found in enveloped viruses and  
199 phase changes in the phospholipid bilayer leading to cross-linking of associated proteins[22].  
200 Additionally, relative humidity impacts the salt concentration within droplets and at low relative  
201 humidity (<50 %), the solutes crystallize and influenza viability was maintained[26].

202

203 Prior studies have largely focused on the influence of humidity (RH or AH) on influenza virus

204 survival under laboratory conditions ([8, 24-27]). One study modeled influenza virus survival  
205 across varied ranges of ambient indoor AH and humidification levels achievable in school  
206 environments[16]. Based on these findings, we hypothesized that classroom humidification  
207 might be a feasible approach to increase indoor AH to levels that could decrease influenza virus  
208 survival and transmission. Taking classroom humidification the next step further we included  
209 collection of samples from classroom environments and demonstrated that humidified rooms  
210 exhibited fewer influenza A-positive samples and reduced copy number. Additionally, influenza  
211 A-positive samples were less infectious in humidified rooms. Together, these outcomes strongly  
212 support the hypothesis that deliberate humidification can mitigate influenza activity in a school  
213 environment.

214

215 In this study, humidifiers significantly increased the overall amount of particles, especially by  
216 increasing number of small air particles, finally leading to an increase in larger size particles,  
217 thereby rendering a shift in distribution towards largest particles,  $>4 \mu\text{m}$ . This could be attributed  
218 to the aggregation of particles in the humidified air, reducing the time of air suspension and  
219 transmission via inhalation. These findings enable a better understanding of the impact of  
220 humidity on influenza A virus survival (surfaces and objects) as well as virus transmissibility via  
221 aerosols by measuring the size of aerosol particles and the distribution of viruses within different  
222 sizes of particles.

223

224 Adding direct measurements of influenza (or other respiratory viruses) in a larger experimental  
225 population may reveal higher resolution outcomes to this approach. Furthermore, the impact of  
226 exogenous humidification on other viruses will need to be similarly measured to more fully

227 understand the full potential impact of this NPI on other sources of communicable respiratory  
228 infections.

229

## 230 **Materials and Methods**

### 231 **Study site and absence data**

232 The study was conducted at Aldrich Memorial Nursery School, Rochester, MN (a preschool with  
233 students aged 2-5 years) from January 2016-March 2016. Classrooms of identical design (see S4  
234 Fig) each with their own HVAC system for air handling were utilized. This study received prior  
235 IRB review and has been approved as an IRB #15-000476, an exempt study (Not Human Subject  
236 Research). Aldrich staff collected information on student absences (January 4, 2016- March 31,  
237 2016) including ILI symptoms from students who were ill. ILI was defined as having fever plus  
238 cough or sore throat.

239

### 240 **Humidifiers, humidity measurements, and absolute humidity calculations**

241 Model XTR (XTR003E1M) electrode steam humidifier with steam blower (SDU-003E)  
242 (DriSteem, Eden Prairie, MN) was installed in two experimental classrooms. The boiling of the  
243 softened tap water source provided decontamination of the steam distributed through the steam  
244 blowers. Classroom temperature and relative humidity were recorded every 10 minutes during  
245 the duration of the study with HOBO external data loggers, Model #U12-012 (Onset Computer  
246 Corporation, Bourne, MA). Two data loggers were installed per classroom, placed on the interior  
247 walls and set on top of the bulletin boards at a height of 2.032 meters. Data exported to Excel  
248 using HOBOWare software (Onset Computer Corporation, Bourne, MA). Outdoor temperature  
249 and relative humidity was obtained from the North American Land Data Assimilation System

250 (NLDAS) project[20]. Absolute humidity was calculated using Excel software using formulas as  
251 previously described[16].

252

### 253 **Bioaerosol sampler**

254 NIOSH two-stage bioaerosol cyclone samplers[28, 29] collected air samples and separated them  
255 into three size fractions ( $>4 \mu\text{m}$ ,  $1-4 \mu\text{m}$ , and  $<1 \mu\text{m}$ ) at a flow rate of  $3.5 \text{ L / minute}$ . NIOSH  
256 samplers were connected to AirChek XR5000 personal air sampling pumps, Model 224-PCXR4  
257 (SKC Inc., Eighty Four, PA). Flow rate was calibrated using a Mass Flowmeter 4140 (TSI,  
258 Shoreview, MN), prior to each run of 150 minutes. Falcon conical tubes (15mL) (Corning,  
259 Corning, NY), 1.5 mL Fisherbrand microcentrifuge (Fisher Scientific, Pittsburgh, PA) and 37  
260 mm hydrophobic Fluoropore PTFE membrane with a  $3.0 \mu\text{m}$  pore size (EMD Millipore,  
261 Billerica, MA) were used to collect 3 different size fractions. Air sampling pumps were placed  
262 inside plastic ammunition boxes lined with mattress topper material (donated by Rest Assured  
263 Mattress Co, Rochester, MN). Cyclone samplers were affixed to the outside box surface with  
264 Industrial Strength Tape Strips (Velcro, Manchester, NH).

265

### 266 **Particle Counts**

267 After class dismissal, particle counts were measured in the center of each classroom at a height  
268 of 91 cm for 1 minute using a Six Channel Handheld Particle Counter, Model 23v750  
269 (Grainger, Lake Forest, IL). Sizes of particles measured were 0.3, 0.5, 1, 2.5, 5, and  $10 \mu\text{m}$ .  
270 Particle size data was binned into sizes to match those collected by the NIOSH samplers such  
271 that  $<1 \mu\text{m}$  included 0.3 and  $0.5 \mu\text{m}$  sizes,  $1-4 \mu\text{m}$  included 1 and  $2.5 \mu\text{m}$  and  $>4 \mu\text{m}$  included 5

272 and 10  $\mu\text{m}$ . Particle counts were also measured before and after humidifier turned on in a pilot  
273 test.

274

### 275 **Air samples**

276 NIOSH samplers were disassembled in a BSLII biosafety cabinet. Collection tubes received 1 mL  
277 of infection media. Filters were retrieved from inside black polypropylene filter cassettes opened  
278 with a Stainless Steel SureSeal Cassette Opener (SKC Inc., Eighty Four, PA) and placed inside a  
279 15 mL conical tube containing 1 mL infection media. The air filter was pushed down into the  
280 media using a sterile 1 mL serological pipette. Samples were placed on ice until ready for further  
281 processing.

282

### 283 **Fomites**

284 25 % cotton linen paper (Southworth, Neenah, WI) wrapped objects were provided to students.  
285 Objects included markers and a variety of wooden toys including blocks, rolling pins patterned  
286 wheel press and stamping cubes (Melissa & Doug, Wilton, CT). Additional items present in the  
287 classroom were also wrapped including rolling pins, hard rubber brayers, and plastic pizza  
288 cutters. After play, paper was transported back to BSL2 laboratory.

289

### 290 **Processing of fomites and air samples**

291 Papers from classroom objects were lightly dusted with fingerprinting powder (Hi-Fi Volcano  
292 Latent Print Powder, Sirchie Youngsville, NC). Once fingerprint was identified, a portion of  
293 paper ( $\sim 3.5\text{-}4\text{ cm}^2$ ) was removed and placed into a 15 mL conical tube containing 1 mL of  
294 infection media. Samples were placed on ice until ready for further processing.

295  
296 Both fomites (paper) and air samples (in media) were vortexed briefly and incubated on ice for  
297 15 minutes. Samples were vortexed again prior to centrifugation for 20 minutes at 4 °C at 3313g  
298 (15 mL tubes) and centrifuged at room temperature at 1520g in a microcentrifuge (1.5 mL  
299 tubes). Liquid was removed from 15 mL conical tubes and transferred to 1.5 mL conical tubes.  
300 The supernatant from these samples was frozen at -80 °C and used for subsequent RNA isolation  
301 and qRT-PCR.

302

### 303 **Influenza A virus controls and infectivity assay**

304 Viral stocks of influenza A (H3N2) were provided by the Clinical Virology Laboratory, Mayo  
305 Clinic, Rochester, MN. Samples were thawed and used to infect bulk cultures of MDCK.  
306 Influenza A infections followed published methods[30], except DMEM media used instead of  
307 MEM. The contents of the flask were collected once cells became non-adherent and centrifuged  
308 4 °C at 3313g for 10 minutes to pellet cellular debris. Aliquots of supernatant were stored at -80  
309 °C. Samples were assayed for influenza A virus infectivity by electrical impedance assay[21]  
310 run on an xCELLigence RTCA MP instrument (ACEA Biosciences, Inc., Sand Diego, CA).  
311 After calibration with media, wells were seeded with MDCK cells. Twenty-four hours later,  
312 media was removed and the cells were washed with PBS. Wells were inoculated with serially  
313 diluted influenza A virus (positive controls), media (negative controls) and samples (tests).  
314 Readings were taken every 15 min for 7 days post inoculation. Using influenza A virus stock,  
315 dose dependent decline in cell index was demonstrated with 1:1000 dilutions, and gradual  
316 decline at 1:10000 and 1:100000 dilutions, whereas further dilutions did not impact cell index  
317 any differently than media controls (Fig. 2B and Fig. S3).

318

319 **Viral RNA isolation and detection using quantitative reverse transcription PCR (qRT-**  
320 **PCR)**

321 The supernatant from fomite and air samples was thawed and 140  $\mu$ L used for viral RNA  
322 isolation with the Viral RNA isolation kit (Qiagen) as per the manufacturer's instructions,  
323 followed by RT-PCR analyses. The nonstructural (NS1 gene) sequence of influenza A was used  
324 for virus detection. See S2 Table for list of primers, product sizes and annealing temperature  
325 information. See S5 Figure for detection of viral RNA in multiplexed qRT-PCR. Briefly, SYBR  
326 green qRT-PCR was performed as described by the manufacturer (Qiagen SYBR green  
327 Quantitect kit). The PCR thermal profile consisted of an initial cDNA step of 30 minutes at 50  
328  $^{\circ}$ C followed by 15 minutes at 95  $^{\circ}$ C and 30 cycles of 30 seconds at 95  $^{\circ}$ C, 30 seconds at 56.5  $^{\circ}$ C,  
329 and 30 seconds at 72  $^{\circ}$ C. Detection, quantification and data analysis were performed in the CFX  
330 manager real-time detection system (Bio-Rad).

331

332 **In-vitro transcription of influenza A viral RNA**

333 Though Influenza A and B and RSV were included in this analysis, low numbers of positive  
334 samples for RSV and Influenza B moved the focus of the study to influenza A only.

335 Quantification of influenza A RNA was performed using in vitro transcription (IVT). The NS1  
336 gene was amplified from a H3N2 influenza A virus isolate from infected MDCK cells using  
337 primers containing T7 promoter sequence in the forward sites: Inf AF: 5'-  
338 ACTGCTTAATACGACTCACTATAGGGAGATTTTCACCGAGGAGGGAGCA -3', Inf  
339 AR: 5'- CCTCCGATGAGGACCCCAA -3';. The amplified NS1 gene was in-vitro transcribed  
340 with T7 RNA polymerase (Megascript T3 kit, Ambion, ABI) according to the manufacturer's

341 instructions for synthesizing short transcripts (105 bp) with the following modifications:  
342 incubation time increased to 8 hours and the enzyme mixture and template RNA was increased  
343 by three-fold of its original concentration. The synthesized RNA pellet was suspended in 0.1%  
344 diethylpyrocarbonate-treated water. RNA transcripts were purified, quantified and mixed with  
345 nuclease free water for preparation of positive controls in the range from  $10^1$ - $10^7$  copies for the  
346 standard curve development. The amount of IVT-generated fragments was determined using the  
347 NanoDrop ND2000 Spectrophotometer (NanoDrop Technologies, Inc., Wilmington, DE) and  
348 converted to molecular copies according to the formula:

$$Y \frac{\text{molecules}}{\mu\text{L}} = \frac{\left(\frac{Xg}{\mu\text{L}} \text{ IVT RNA} \times 6.02 \times 10^{23}\right)}{(340 \times \text{transcript length (bp)})}$$

349 The detection limit of the SYBR green real time RT-PCR assay was determined by testing serial  
350 ten-fold dilutions of the in vitro transcribed influenza A viral RNA ranging from  $10^1$  to  
351  $10^7$  copies/ $\mu\text{L}$ . Cycle-threshold (Ct) values were plotted against the RNA copy number to  
352 construct the standard curve. The viral copy numbers of the processed samples were estimated  
353 by plotting the respective Ct values on the standard curve. See S6 Figure for standard curve  
354 example.

355

### 356 **Detection and quantification**

357 Using serially diluted in vitro transcribed influenza A RNA, viral particles were detectable  
358 ranging from  $10^1$  -  $10^7$  RNA copies using the described assay. qRT-PCR sampling was  
359 sufficiently sensitive to detect as few as 7 RNA copies.

360

### 361 **Statistical analyses**



362 Percentage of samples positive for influenza A (Table 1): To account for within-room clustering  
363 for class cohorts, generalized estimating equations were utilized with a binomial family and logit  
364 link. Data are reported as odds ratio of positive test result for humidified rooms as compared to  
365 control rooms, with a 95% confidence interval and p-value. Odds ratios below one (with  
366 statistical significance) demonstrate protective effects of humidification in that positive influenza  
367 was less likely to be obtained by the relevant capture system. Capture systems for influenza  
368 included paper and air (total,  $>4 \mu\text{m}$ ,  $1\text{-}4 \mu\text{m}$ ,  $<4 \mu\text{m}$ ); results were treated as positive for any  
369 capture within the room to minimize the effect of the different number of collectors per room for  
370 the paper and air capture systems.

371

372 Mean copy number of influenza A positive samples (Table S1): To account for within-room  
373 clustering for class cohorts, generalized estimating equations were utilized with a gaussian  
374 family and identity link. Data are reported as the mean (standard deviation) of copy number for  
375 humidified rooms as compared to control rooms, with a 95% confidence interval and p-value.  
376 Capture systems for influenza included paper and air (total,  $>4 \mu\text{m}$ ,  $1\text{-}4 \mu\text{m}$ ,  $<4 \mu\text{m}$ ).

377

### 378 **Data Availability**

379 The data that support the findings of this study are available from the corresponding author upon  
380 request.

381

382 **Figure Legends**

383

384 **Fig. 1. Absolute Humidity and influenza hospitalized cases.** (A) Outdoor absolute  
385 humidity (AH) values (n=65; one measurement per day) from Rochester, MN and influenza  
386 hospitalized cases in MN (n=1070, week ending in January 16<sup>th</sup>- March 19<sup>th</sup>). Applying the  
387 national trend model described by Shaman et al.[31] to the local humidity and illnesses,  
388 onset of influenza followed the predicted delay of 10-16 days (grey box) after an absolute  
389 humidity trough (blue box). Peak cases follow (pink box), as there is an incubation period  
390 of 1-4 days with viral shedding up to 7 days after symptoms resolve. (B) AH in 4 preschool  
391 classrooms (average of two sensors from 10 minute intervals over 150 minutes (n=16 per  
392 sensor, room D) or (n=17 per sensor, rooms A,B, C) per class period per sensor). Center  
393 values are mean of both sensors during class time and error bars are s.d. and  
394 corresponding outdoor AH (n=15, 1 per day) on the 15 days of sample collection.  
395 Humidifiers were running in humidified rooms through sample collection on February 23.

396

397 **Fig. 2. Influenza A (NS1) average copy number and infectivity of positive samples in**  
398 **electrical impedance assay.** (A) Horizontal bars indicate mean copy number and error  
399 bars are 95% CI. Fomites control, n= 31; Fomites humidified, n=27; Air (total) control,  
400 n=33; Air (total) humidified, n=21. (B) Each line indicates a sample (well) for infectivity.  
401 MDCK cells were added at time 0 hours and media changed to samples (n=27 in triplicate),  
402 influenza A positive control dilutions (6) in duplicate or control media in triplicate at 24  
403 hours. Cell indices that returned to 0 indicated cell death (infectious). Arrows indicate  
404 individual samples. \* indicates P<0.001.

405

406

407 **Contributions of authors**

408 AG/GMS/HJF/KE/PL/WCH/SCE/CP designed the study. BD/JMR did the sample collection, all  
409 experiments, analyses of results, and drafted the manuscript. GMS provided analysis of indoor  
410 humidity data and procured air sampling equipment from NIOSH/CDC. GMS, KMS, MDU, and  
411 HJF assisted with cell culture infectivity assays. BD and MDU performed RNA isolation.  
412 MEMH directed UMR undergraduate work-study students in processing of paper wrapped  
413 objects. HBL assisted with air particle analyses. JLG analyzed student absence/attendance data.  
414 ARG conducted initial pilot study at Aldrich winter-spring 2015. THK provided outdoor  
415 humidity data and assisted with humidity analyses. KE provided the student data, turned on/off  
416 humidifiers and made adjustments to settings, and assisted with school management. PL  
417 provided humidifiers. SCE helped with analyses and trouble-shooting and revised the  
418 manuscript. WCH provided wording for collecting ILI school data and revised the manuscript.  
419 HJF provided BSL-2 laboratory oversight, and assisted in analyses. CP conceived the study,  
420 helped with study design, analyses and drafted the manuscript. FTE provided statistical analyses.  
421

## 422 **Acknowledgements**

423 The authors would like to thank the staff, students, parents and board of directors at Aldrich  
424 Memorial Nursery School for their support in allowing us to conduct this study. We  
425 acknowledge the support from DriSteem for supplying the humidifiers and covering the cost of  
426 humidifier installation for this study. We also recognize Chuck Dixon and Rest Assured Mattress  
427 Co, Rochester, MN for allowing us to try out different noise deadening materials and donating  
428 the material for our study. We thank Matt Binnicker, PhD and colleagues in the Clinical  
429 Virology Laboratory, Department of Laboratory Medicine and Pathology, Mayo Clinic, for  
430 providing Influenza A virus and other virus isolates and advice. Thanks to Bill Lindsley at  
431 NIOSH/CDC for supplying the NIOSH bioaerosol samplers for air sample collection. We also  
432 acknowledge the work of University of Minnesota-Rochester work-study students (Paige  
433 Diedrick, Ashlyn Stenberg, Ali Ali, Shidae Yang) as well as other InSciEd Out team members  
434 for wrapping of wooden blocks and markers with paper and cleaning up these objects after  
435 sample processing for future use. Thanks to Steve Offer and the laboratory of Robert Diasio,  
436 Mayo Clinic Cancer Center, for use of the xCELLigence MP equipment for the infectivity assay.  
437 The methodology flow chart figure was prepared by J. Mark Curry, Division of Creative Media,  
438 Mayo Clinic.

439 This work was supported by CTSA Grant Number UL1 TR000135 from the National Center for  
440 Advancing Translational Science (NCATS), a component of the National Institutes of Health  
441 (NIH). Its contents are solely the responsibility of the authors and do not necessarily represent  
442 the official views of the NIH. Additional funding was contributed by Mayo Clinic Pediatric and  
443 Adolescent Medicine [through WCH] and intramural grants from Mayo Clinic Infectious  
444 Disease [to HJF].

## 445 **References**

- 446 1. WHO. Influenza (Seasonal) Fact Sheet N°211. 2014. [updated March 2014; cited  
447 2015 October 15]. Available from:  
448 <http://www.who.int/mediacentre/factsheets/fs211/en/>.
- 449 2. Lafond KE, Nair H, Rasooly MH, Valente F, Booy R, Rahman M, et al. Global Role and  
450 Burden of Influenza in Pediatric Respiratory Hospitalizations, 1982-2012: A Systematic  
451 Analysis. *PLoS Med*. 2016;13(3):e1001977. doi: 10.1371/journal.pmed.1001977.
- 452 3. Ozawa S, Portnoy A, Getaneh H, Clark S, Knoll M, Bishai D, et al. Modeling The  
453 Economic Burden Of Adult Vaccine-Preventable Diseases In The United States. *Health Aff*  
454 (Millwood). 2016;35(11):2124-32. doi: 10.1377/hlthaff.2016.0462.
- 455 4. Molinari NA, Ortega-Sanchez IR, Messonnier ML, Thompson WW, Wortley PM,  
456 Weintraub E, et al. The annual impact of seasonal influenza in the US: measuring disease  
457 burden and costs. *Vaccine*. 2007;25(27):5086-96. doi: 10.1016/j.vaccine.2007.03.046.
- 458 5. Minnesota Department of Health Weekly Influenza & Respiratory Illness Activity  
459 Report- Summary of 2014-15 Influenza Season. 2015. [updated October 6, 2016; cited 2015  
460 September 10]. Available from:  
461 <http://www.health.state.mn.us/divs/idepc/diseases/flu/stats/2014summary.pdf>.
- 462 6. Musher DM. How contagious are common respiratory tract infections? *N Engl J Med*.  
463 2003;348(13):1256-66.
- 464 7. Brownstein JS, Mandl KD. Pediatric population size is associated with geographic  
465 patterns of acute respiratory infections among adults. *Ann Emerg Med*. 2008;52(1):63-8.  
466 doi: 10.1016/j.annemergmed.2008.02.009.
- 467 8. Tellier R. Aerosol transmission of influenza A virus: a review of new studies. *J R Soc*  
468 *Interface*. 2009;6 Suppl 6(Suppl 6):S783-90. doi: 10.1098/rsif.2009.0302.focus.
- 469 9. Thomas Y, Vogel G, Wunderli W, Suter P, Witschi M, Koch D, et al. Survival of  
470 influenza virus on banknotes. *Appl Environ Microbiol*. 2008;74(10):3002-7. doi:  
471 10.1128/AEM.00076-08.
- 472 10. Edward DF. Resistance of influenza virus to drying and its demonstration on dust.  
473 *The Lancet*. 1941;238(6170):664-6.
- 474 11. Greatorex JS, Digard P, Curran MD, Moynihan R, Wensley H, Wreghitt T, et al.  
475 Survival of influenza A(H1N1) on materials found in households: implications for infection  
476 control. *PLoS One*. 2011;6(11):e27932. doi: 10.1371/journal.pone.0027932.
- 477 12. Mukherjee DV, Cohen B, Bovino ME, Desai S, Whittier S, Larson EL. Survival of  
478 influenza virus on hands and fomites in community and laboratory settings. *Am J Infect*  
479 *Control*. 2012;40(7):590-4. doi: 10.1016/j.ajic.2011.09.006.
- 480 13. Bean B, Moore BM, Sterner B, Peterson LR, Gerding DN, Balfour HH, Jr. Survival of  
481 influenza viruses on environmental surfaces. *J Infect Dis*. 1982;146(1):47-51.
- 482 14. Shaman J, Kohn M. Absolute humidity modulates influenza survival, transmission,  
483 and seasonality. *Proc Natl Acad Sci U S A*. 2009;106(9):3243-8. doi:  
484 10.1073/pnas.0806852106.
- 485 15. Sterling E, Arundel A, Sterling T. Criteria for human exposure to humidity in  
486 occupied buildings. *ASHRAE transactions*. 1985;91(1B):611-22.
- 487 16. Koep TH, Enders FT, Pierret C, Ekker SC, Krageschmidt D, Neff KL, et al. Predictors of  
488 indoor absolute humidity and estimated effects on influenza virus survival in grade schools.  
489 *BMC Infect Dis*. 2013;13:71. doi: 10.1186/1471-2334-13-71.

- 490 17. Lindsley WG, Blachere FM, Davis KA, Pearce TA, Fisher MA, Khakoo R, et al.  
491 Distribution of airborne influenza virus and respiratory syncytial virus in an urgent care  
492 medical clinic. *Clin Infect Dis*. 2010;50(5):693-8. doi: 10.1086/650457.
- 493 18. Yang W, Elankumaran S, Marr LC. Concentrations and size distributions of airborne  
494 influenza A viruses measured indoors at a health centre, a day-care centre and on  
495 aeroplanes. *J R Soc Interface*. 2011;8(61):1176-84. doi: 10.1098/rsif.2010.0686.
- 496 19. Minnesota Department of Health Weekly Influenza & Respiratory Illness Activity  
497 Report- Summary of 2015-16 Influenza Season. 2016. [updated October 6, 2016; cited 2016  
498 October 31]. Available from:  
499 <http://www.health.state.mn.us/divs/idepc/diseases/flu/stats/2015summary.pdf>.
- 500 20. NOAA/NCEP/EMC. North American Land Data Assimilation System. 2016. [cited  
501 2016]. Available from: <http://www.emc.ncep.noaa.gov/mmb/nlds>.
- 502 21. McCoy MH, Wang E. Use of electric cell-substrate impedance sensing as a tool for  
503 quantifying cytopathic effect in influenza A virus infected MDCK cells in real-time. *J Virol*  
504 *Methods*. 2005;130(1-2):157-61. doi: 10.1016/j.jviromet.2005.06.023.
- 505 22. Cox CS. Airborne bacteria and viruses. *Sci Prog*. 1989;73(292 Pt 4):469-99.
- 506 23. Tang JW. The effect of environmental parameters on the survival of airborne  
507 infectious agents. *J R Soc Interface*. 2009;6 Suppl 6:S737-46. doi:  
508 10.1098/rsif.2009.0227.focus.
- 509 24. Weber TP, Stilianakis NI. Inactivation of influenza A viruses in the environment and  
510 modes of transmission: a critical review. *J Infect*. 2008;57(5):361-73. doi:  
511 10.1016/j.jinf.2008.08.013.
- 512 25. Lowen AC, Steel J. Roles of humidity and temperature in shaping influenza  
513 seasonality. *J Virol*. 2014;88(14):7692-5. doi: 10.1128/JVI.03544-13.
- 514 26. Yang W, Elankumaran S, Marr LC. Relationship between humidity and influenza A  
515 viability in droplets and implications for influenza's seasonality. *PLoS One*.  
516 2012;7(10):e46789. doi: 10.1371/journal.pone.0046789.
- 517 27. Noti JD, Lindsley WG, Blachere FM, Cao G, Kashon ML, Thewlis RE, et al. Detection of  
518 infectious influenza virus in cough aerosols generated in a simulated patient examination  
519 room. *Clin Infect Dis*. 2012;54(11):1569-77. doi: 10.1093/cid/cis237.
- 520 28. Blachere FM, Lindsley WG, Slaven JE, Green BJ, Anderson SE, Chen BT, et al.  
521 Bioaerosol sampling for the detection of aerosolized influenza virus. *Influenza Other Respir*  
522 *Viruses*. 2007;1(3):113-20. doi: 10.1111/j.1750-2659.2007.00020.x.
- 523 29. Lindsley WG, Schmechel D, Chen BT. A two-stage cyclone using microcentrifuge  
524 tubes for personal bioaerosol sampling. *Journal of Environmental Monitoring*.  
525 2006;8(11):1136-42.
- 526 30. Eisfeld AJ, Neumann G, Kawaoka Y. Influenza A virus isolation, culture and  
527 identification. *Nat Protoc*. 2014;9(11):2663-81. doi: 10.1038/nprot.2014.180.
- 528 31. Shaman J, Pitzer VE, Viboud C, Grenfell BT, Lipsitch M. Absolute humidity and the  
529 seasonal onset of influenza in the continental United States. *PLoS Biol*.  
530 2010;8(2):e1000316. doi: 10.1371/journal.pbio.1000316.
- 531

**A** Figure 1

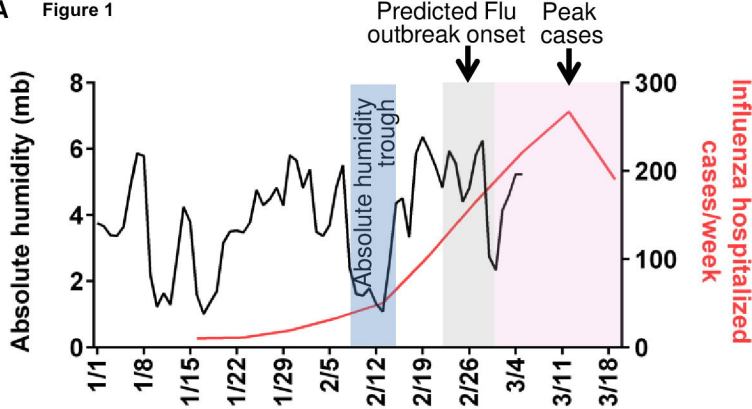

**B**

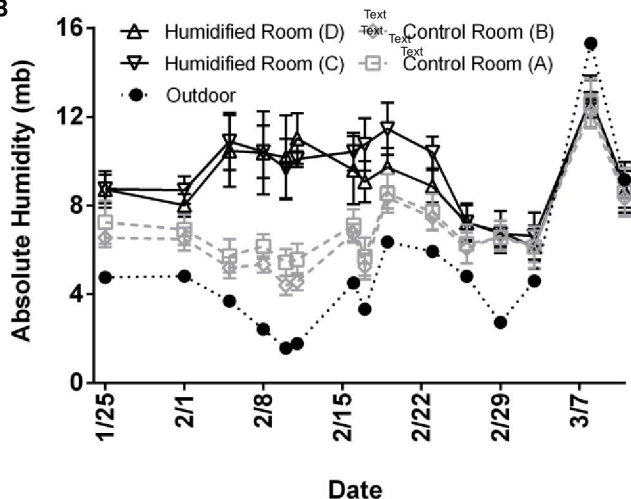

**A** Figure 2

**Fomites**

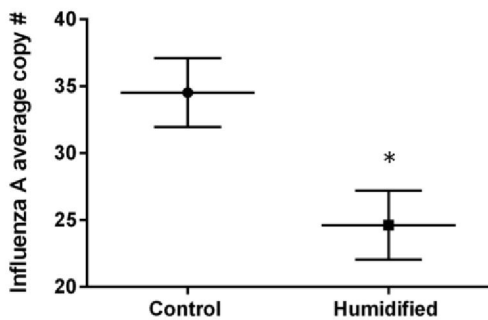

**Air (total)**

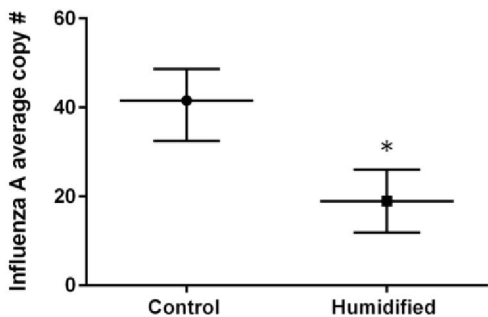

**B**

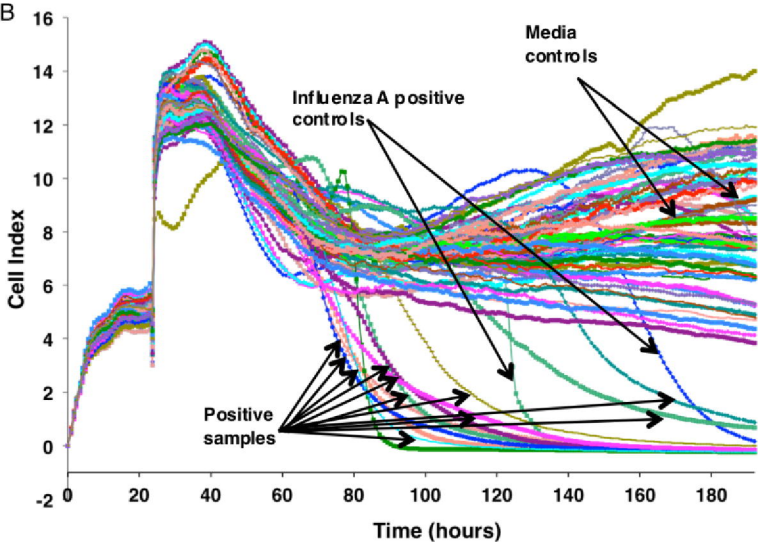

Source: https://www.biorxiv.org/content/10.1101/273870v1.full.pdf
